# Supplementary material for: HIF inhibitor 32-134D eradicates murine hepatocellular carcinoma in combination with anti-PD1 therapy
Source: PubMed Central journal article supplement (PMC9057582; doi:10.1172/jci156774), 2022-05-02
Supplement: jci-132-156774-s078.pdf [file jci-132-156774-s078.pdf]

## **HIF inhibitor 32-134D eradicates murine hepatocellular carcinoma in combination with anti-PD1 therapy**

Shaima Salman, David J. Meyers, Elizabeth E. Wicks, Sophia N. Lee, Emmanuel Datan, Aline M. Thomas, Nicole M. Anders, Yousang Hwang, Yajing Lyu, Yongkang Yang, Walter Jackson III, Dominic Dordai, Michelle A. Rudek, and Gregg L. Semenza

### **SUPPLEMENTAL MATERIAL**

**Supplemental Figures 1 – 9**

**Supplemental Tables 1 – 6**

**Supplemental Methods**

## Supplemental Figures

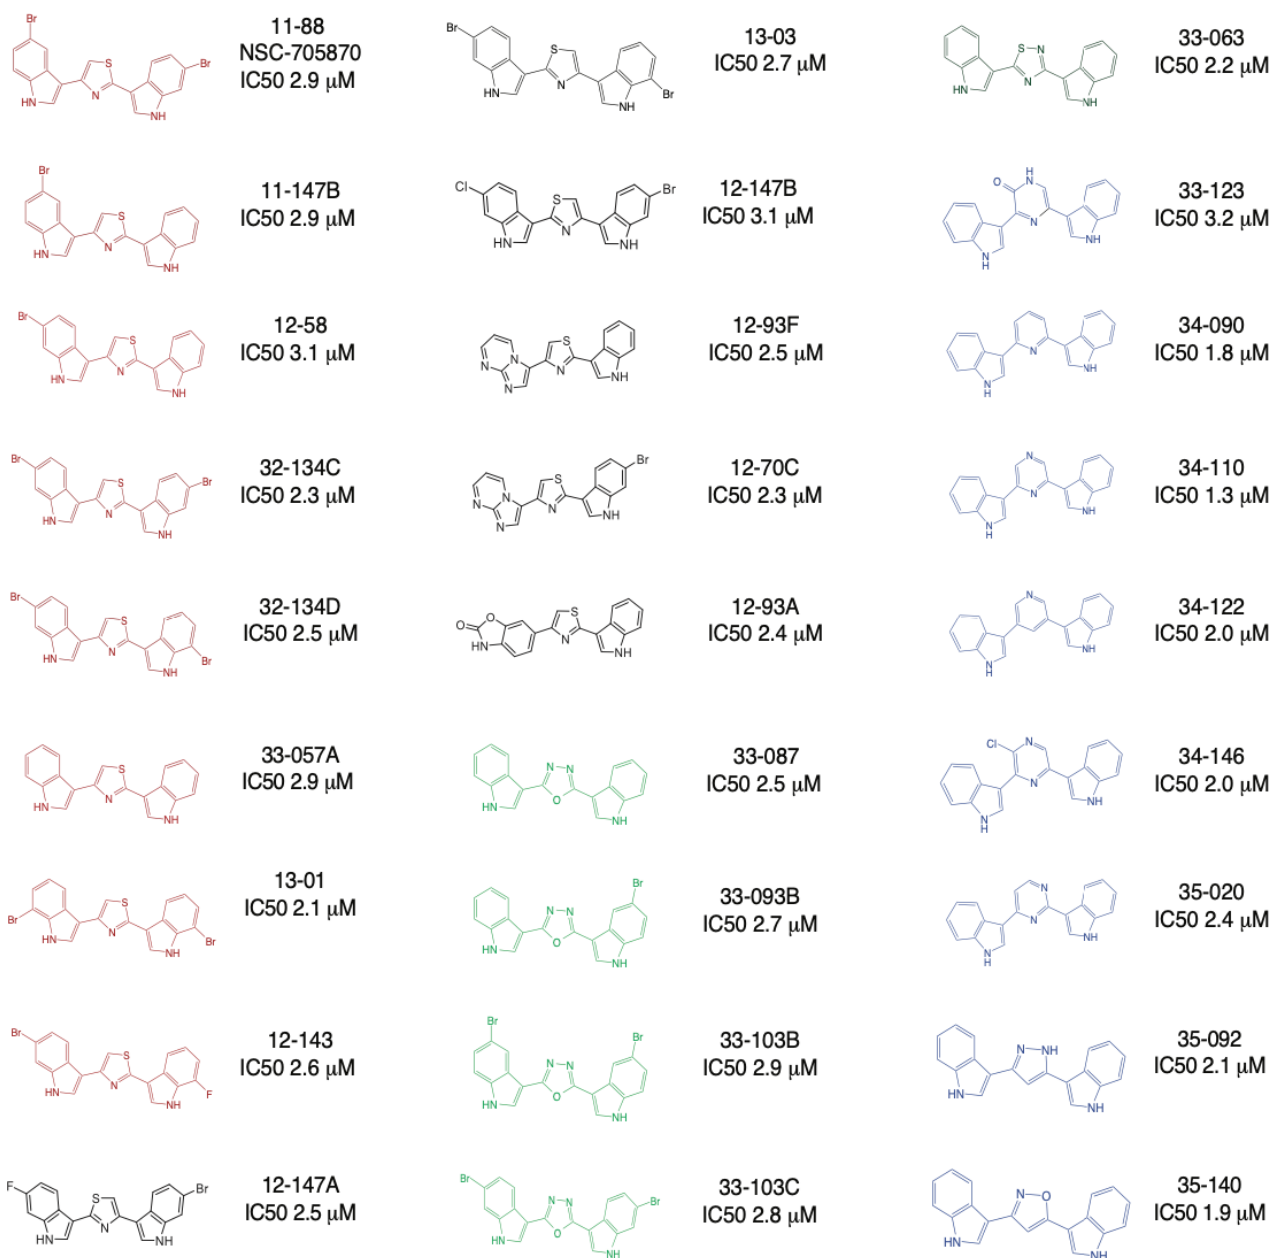

**Supplemental Figure 1. Chemical structure of compounds that inhibited HIF-dependent reporter gene expression in Hep3B-c1 cells. The concentration of each compound that inhibited reporter gene expression by 50% (IC<sub>50</sub>) is shown.**

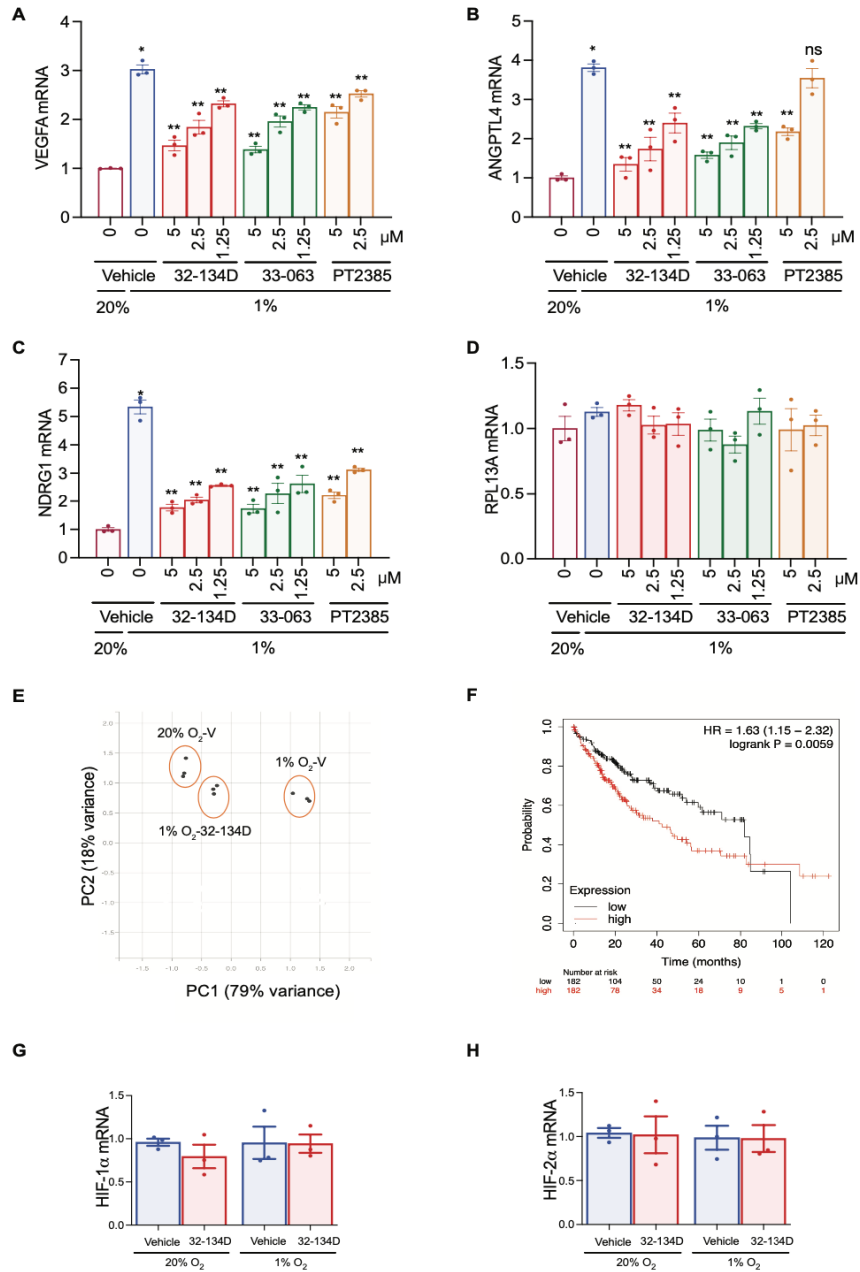

**Supplemental Figure 2. Effect of 32-134D on gene expression in Hep3B cells. (A-D)** Hep3B cells were exposed to 20% O<sub>2</sub> in the presence of vehicle (first bar; no fill) or 1% O<sub>2</sub> in the presence of: vehicle (blue bar) or the indicated concentration of 32-134D (bars with red fill) or 33-063 (bars with green fill), or PT2385 (bars with brown fill) for 24 hours and the indicated mRNAs were quantified by reverse transcription and quantitative real-time PCR (qPCR). Data are presented as mean  $\pm$  SEM (n = 3). \**p* < 0.05 vs white, \*\**p* < 0.01 vs blue (ANOVA with Bonferroni post-test). **(E)** Principal component (PC) analysis of RNA-seq data. **(F)** Kaplan-Meier analysis was performed with HCC patients stratified based on intratumoral expression of a 15-gene HIF signature. The probability of overall survival is plotted on the y-axis. **(G-H)** Analysis of HIF-1 $\alpha$  **(G)** and HIF-2 $\alpha$  **(H)** mRNA expression in Hep3B cells exposed to vehicle or 32-134D at 20% or 1% O<sub>2</sub> for 24 hours.

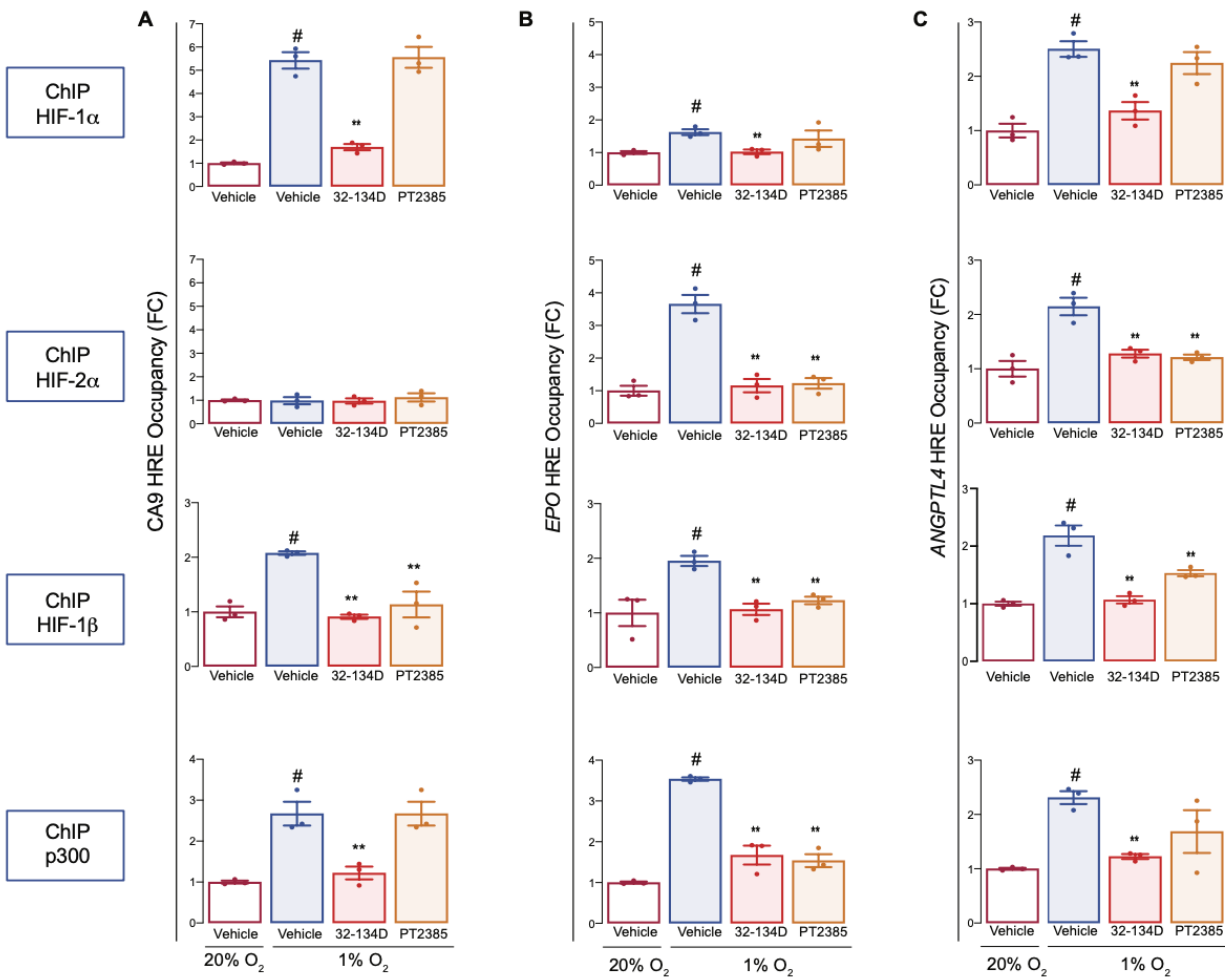

**Supplemental Figure 3. Effect of 32-134D on hypoxia-induced occupancy of HREs by HIFs and P300.** Hep3B cells were cultured for 16 hours at 20% O<sub>2</sub> in the presence of vehicle (V; white bars) or at 1% O<sub>2</sub> in the presence of vehicle (blue bars), 5  $\mu$ M 32-134D (red bars) or 10  $\mu$ M PT2385 (brown bars). Chromatin immunoprecipitation (ChIP) was performed using the indicated antibody (box), followed by qPCR using primers that flanked an HRE in the *CA9* (left column), *EPO* (middle column), or *ANGPTL4* (right column) gene. Data are presented as mean  $\pm$  SEM (n = 3) fold change (FC) normalized to white 20% O<sub>2</sub>. #*p* < 0.05 vs white; \*\**p* < 0.01 versus blue (ANOVA with Bonferroni post-test).

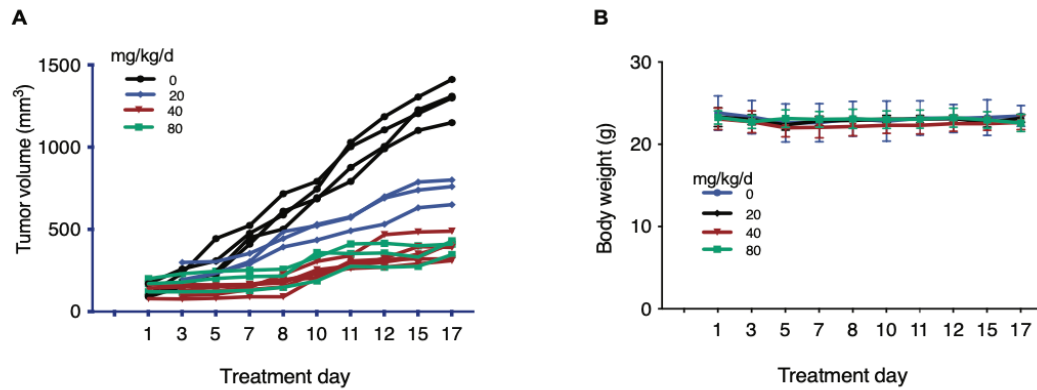

**Supplemental Figure 4. Effect of 32-134D on tumor growth and body weight.** Female nude mice received a subcutaneous injection of  $8 \times 10^6$  Hep3B cells. When tumors reached a volume of 100-150 mm<sup>3</sup> (designated treatment day 1), the mice were randomized to receive a daily intraperitoneal injection of 32-134D at a dose of 0 (black), 20 (blue), 40 (red), or 80 (green) mg/kg. **(A)** Tumor volumes were determined every other day. Individual tumor growth curves are shown. **(B)** Body weights of tumor-bearing mice were measured every other data and are presented as mean  $\pm$  SEM (n = 3-4 per group).

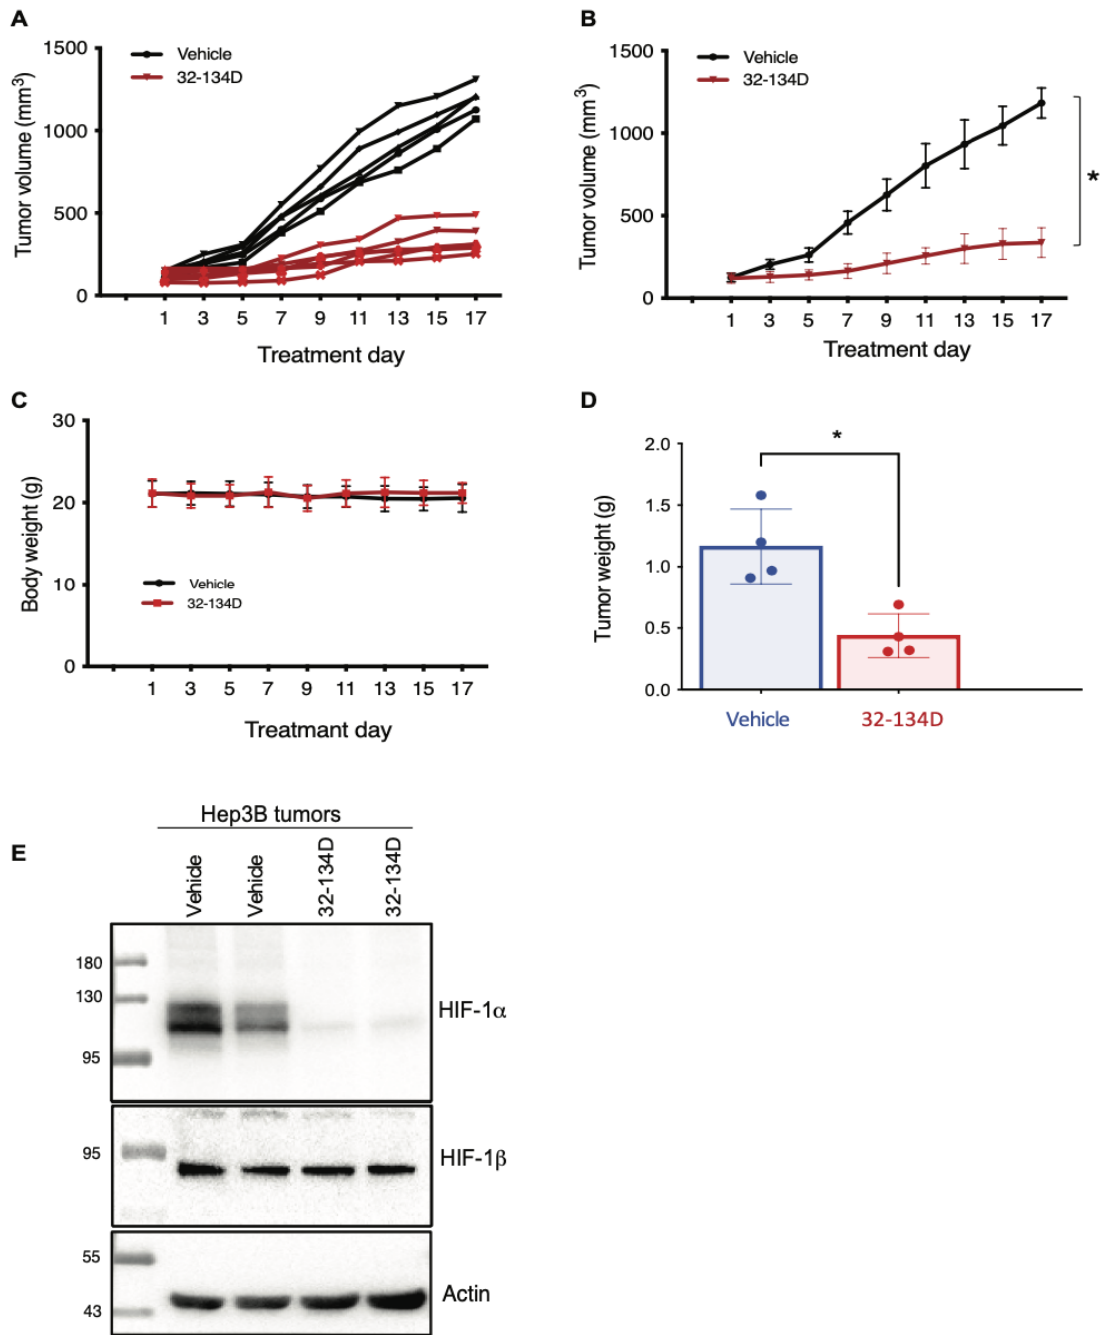

**Supplemental Figure 5. Effect of 32-134D on tumor growth and body weight in additional mice.** (A-D) Tumor bearing mice were treated with daily intraperitoneal injection of vehicle (black) or 32-134D (red; 40 mg/kg) and individual (A) and mean (B) tumor volumes as well as body weight (C) were determined every other day and mean tumor weights (D) were determined on day 17 (mean  $\pm$  SEM, n = 4). \*P < 0.05 by ANOVA. (E) Nuclear extracts were prepared from tumors of vehicle-treated or 32-134D-treated mice and subjected to immunoblot assays using the indicated antibody.

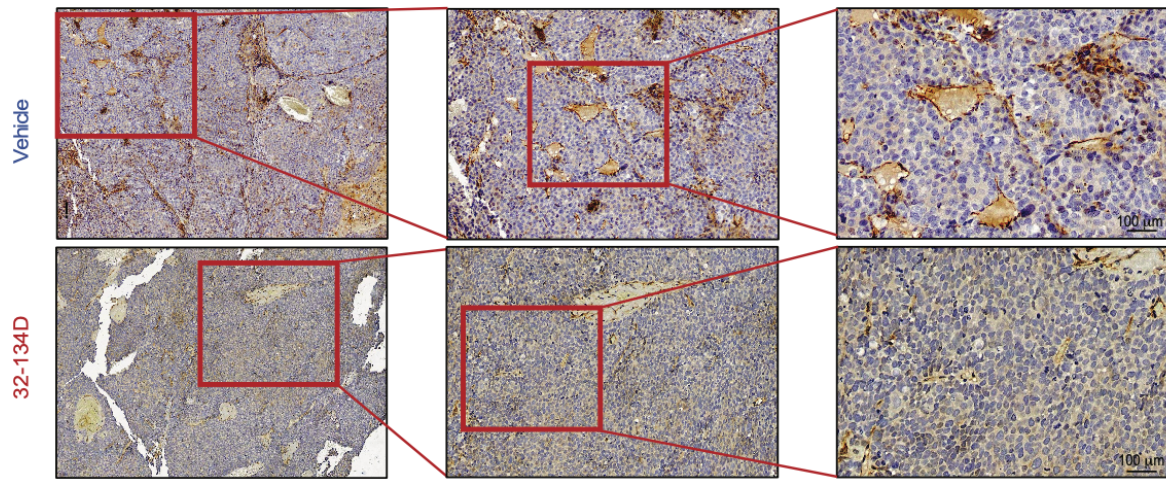

**Supplemental Figure 6. Effect of 32-134D on tumor vascularization.** Formalin-fixed and paraffin-embedded Hep3B tumor xenograft sections were subject to immunohistochemistry using an antibody against CD31 to identify vascular endothelial cells. Scale bar at bottom right indicates 100 μm.

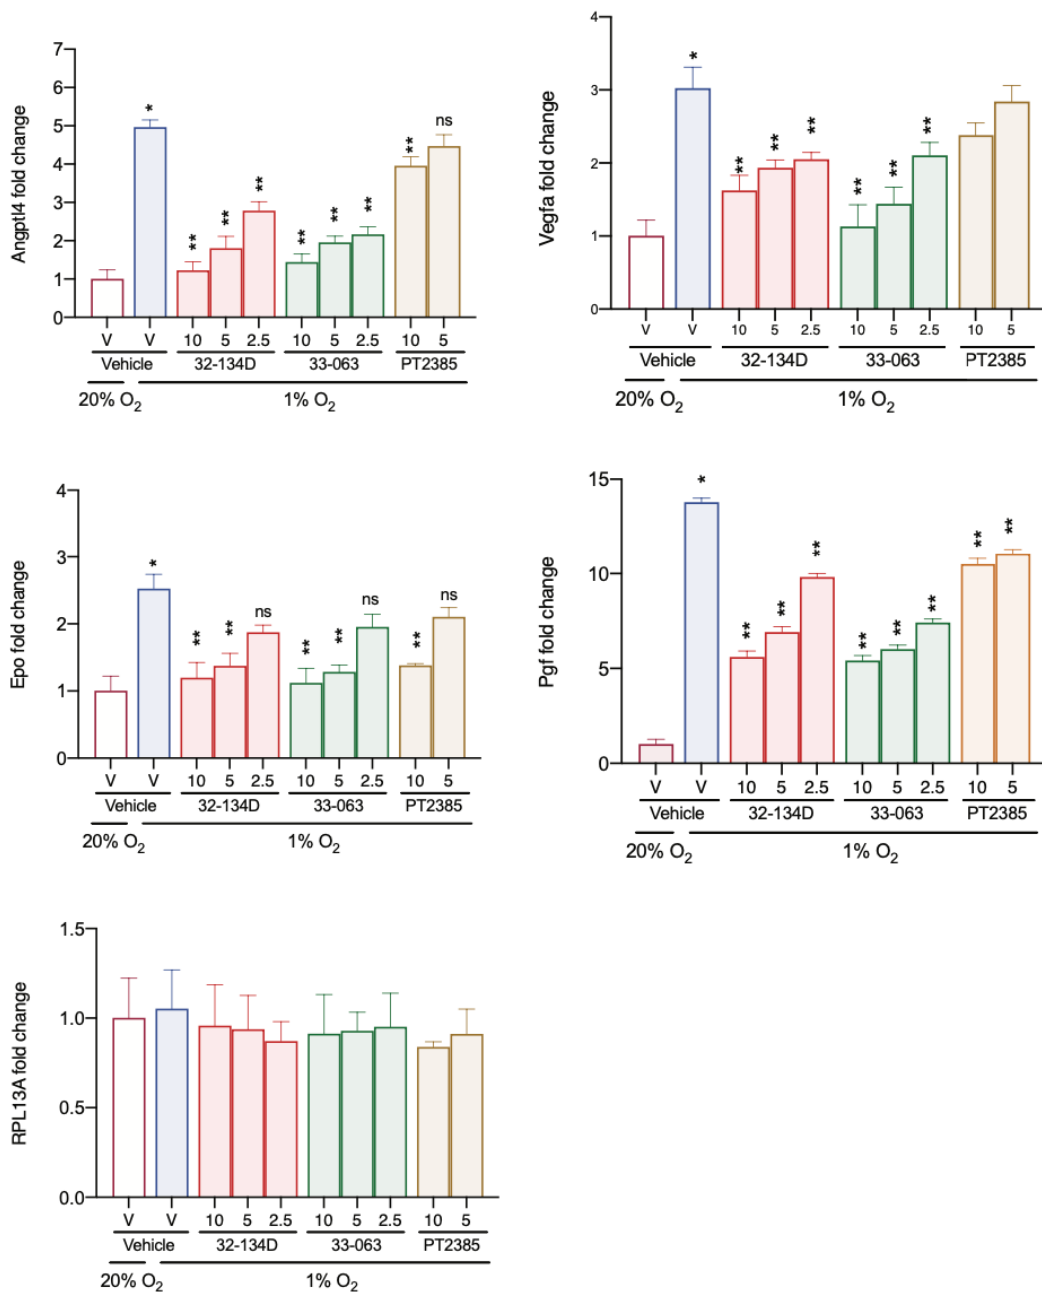

**Supplemental Figure 7. Effect of 32-134D on gene expression in Hepa1-6 cells.** Cells were exposed to 20% O<sub>2</sub> and vehicle (white bar) or 1% O<sub>2</sub> and vehicle (blue bar), 2.5-10 μM 32-134D (red bars), 2.5-10 μM 33-063 (green bars), or 5-10 μM PT2385 (brown bars) for 24 hours and mRNAs were quantified by RT-qPCR and normalized to white (mean ± SEM, n = 4). \* *p* < 0.05 vs white; # *p* < 0.05 vs blue (ANOVA with Bonferroni post-test).



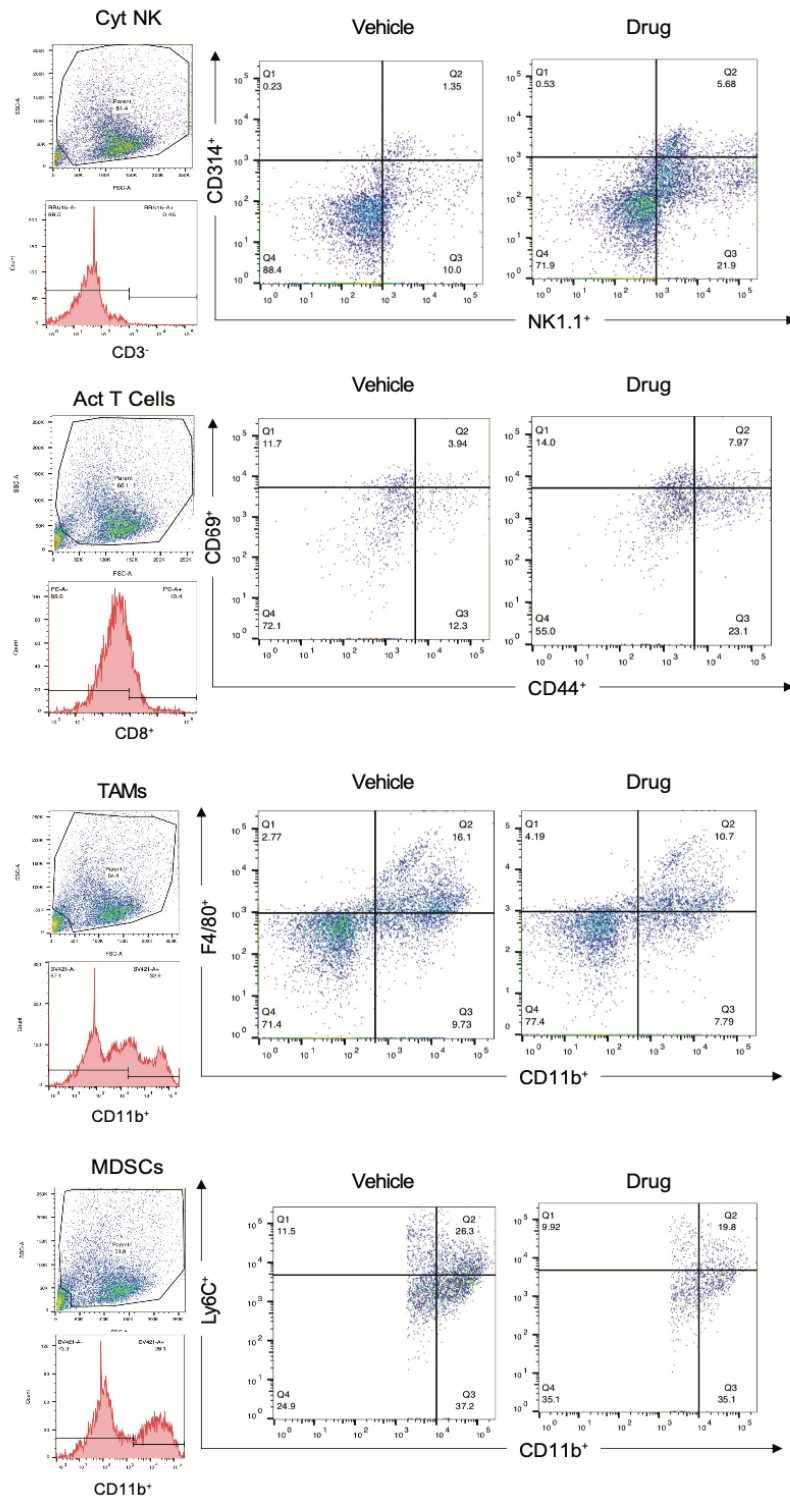

**Supplemental Figure 8. Effect of 32-134D on Hepa1-6 tumor immune cell microenvironment.** C57L mice were injected with Hepa1-6 HCC cells subcutaneously and when tumors reached a volume of 200 mm<sup>3</sup>, the mice were treated with vehicle or 32-134D (40 mg/kg) by daily intraperitoneal injection for 8 days. Single cell suspensions prepared from each tumor were subjected to flow cytometry using fluorescent antibodies against the indicated cell surface proteins. Gating and representative data are shown.

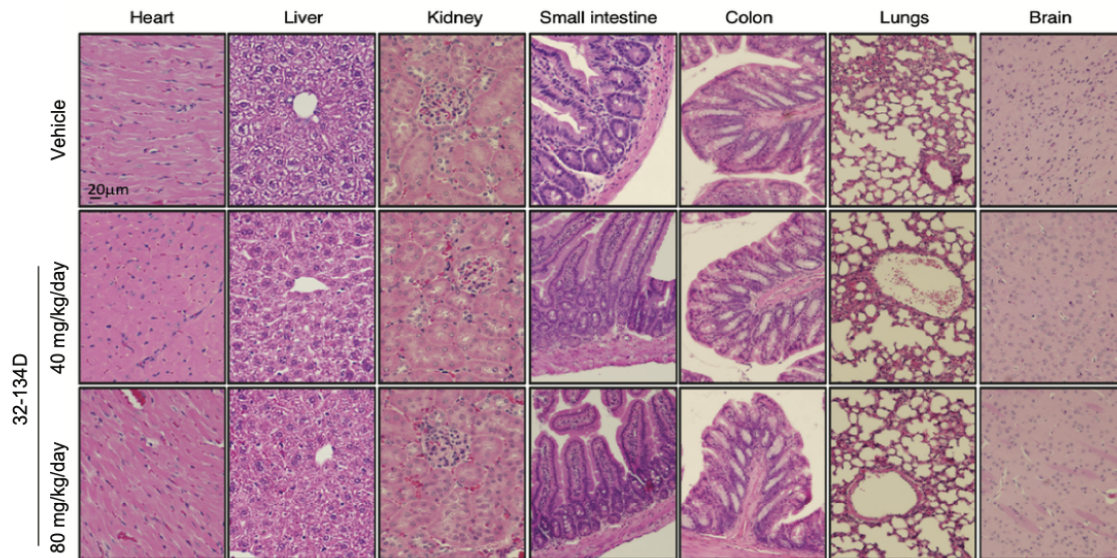

**Supplemental Figure 9.** Normal organ histology in mice treated with 32-134D. Mice were administered vehicle or 32-134D (40 or 80 mg/kg) by daily intraperitoneal injection for 14 days and tissue sections from the indicated organs were stained with hematoxylin and eosin. Scale bar = 20 µm.

## Supplemental Tables

**Supplemental Table 1.** HIF signature in HCC. RNA-seq identified 15 known HIF target genes that were highly induced by exposure of Hep3B cells to 1% O<sub>2</sub> and inhibited by 32-134D. FC, fold change: ratio of mRNA expression in vehicle-treated cells at 1% vs 20% O<sub>2</sub>.

| <u>mRNA</u> | <u>Log<sub>2</sub> FC*</u> |
|-------------|----------------------------|
| ADM         | 5.14                       |
| ALDOA       | 2.98                       |
| ANGPTL4     | 5.39                       |
| BNIP3       | 3.85                       |
| CA9         | 4.34                       |
| EFNA1       | 4.08                       |
| ENO2        | 4.00                       |
| LDHA        | 3.41                       |
| P4HA1       | 4.21                       |
| PDK1        | 3.96                       |
| PFKFB4      | 5.11                       |
| PGK1        | 2.69                       |
| SLC2A1      | 4.18                       |
| STC2        | 3.95                       |
| TMCC1       | 2.83                       |

**Supplemental Table 2.** Liver cancer mRNA expression associated with increased (HR < 1) or decreased (HR > 1) overall survival of HCC patients (*n* = 269) at 3 years by Kaplan-Meier analysis.

| <u>mRNA</u>                  | <u>HR*</u> | <u>p**</u> |
|------------------------------|------------|------------|
| C5/HC <sup>#</sup>           | 0.56       | 3.9e-3     |
| CCL2/CCL12 <sup>^</sup>      | 0.67       | 4.5e-2     |
| CD8A                         | 0.52       | 1.3e-3     |
| CD8B                         | 0.62       | 1.7e-2     |
| CXCL2                        | 0.51       | 8.5e-4     |
| CXCL9                        | 0.63       | 2.0e-2     |
| CXCL10                       | 0.61       | 1.4e-2     |
| KLRB1/NK1.1 <sup>&amp;</sup> | 0.41       | 8.6e-6     |
| KLRK1/CD314 <sup>##</sup>    | 0.38       | 2.5e-6     |
| CA9                          | 2.49       | 6.0e-6     |
| CXCL1                        | 1.49       | 4.5e-2     |
| EPO                          | 1.67       | 9.8e-3     |
| KITLG/SCF                    | 2.28       | 4.8e-5     |
| LDHA                         | 2.35       | 2.6e-5     |
| PGF                          | 1.50       | 4.1e-2     |
| SLC2A1/GLUT1                 | 1.73       | 5.7e-3     |

---

\*HR, hazard ratio; \*\**p* value, log rank test. <sup>#</sup>C5 is the human homolog of murine HC. <sup>^</sup>CCL2 is the human homolog of murine CCL12. <sup>&</sup>KLRB1 is the human homolog of murine NK1.1. <sup>##</sup>KLRK1 is also known as CD314.

**Supplemental Table 3.** Expression of cytokine mRNAs in tumors from mice treated with 32-134D (test group) or vehicle (control group) as determined by an RT-qPCR array.

|    |          |      | Fold Change               | T-TEST  | Fold Up- or Down-Regulation | Y axis           | X axis              |
|----|----------|------|---------------------------|---------|-----------------------------|------------------|---------------------|
|    | Symbol   | Well | Test Group /Control Group | p value | Test Group /Control Group   | (-Log10(pValue)) | (Log2(fold change)) |
| 1  | Adipoq   | A01  | 0.43                      | 0.0159  | -2.31                       | 1.8              | -1.21               |
| 2  | Bmp2     | A02  | 0.51                      | 0.1529  | -1.95                       | 0.8              | -0.96               |
| 3  | Bmp4     | A03  | 0.64                      | 0.3124  | -1.56                       | 0.5              | -0.64               |
| 4  | Bmp6     | A04  | 0.44                      | 0.0138  | -2.27                       | 1.9              | -1.18               |
| 5  | Bmp7     | A05  | 0.70                      | 0.4516  | -1.43                       | 0.3              | -0.51               |
| 6  | Ccl1     | A06  | 0.63                      | 0.4314  | -1.58                       | 0.4              | -0.66               |
| 7  | Ccl11    | A07  | 1.03                      | 0.7782  | 1.03                        | 0.1              | 0.04                |
| 8  | Ccl12    | A08  | 4.11                      | 0.0251  | 4.11                        | 1.6              | 2.04                |
| 9  | Ccl17    | A09  | 0.68                      | 0.4482  | -1.47                       | 0.3              | -0.56               |
| 10 | Ccl19    | A10  | 0.54                      | 0.0011  | -1.86                       | 3.0              | -0.89               |
| 11 | Ccl2     | A11  | 1.35                      | 0.2081  | 1.35                        | 0.7              | 0.44                |
| 12 | Ccl20    | A12  | 0.42                      | 0.0056  | -2.41                       | 2.3              | -1.27               |
| 13 | Ccl22    | B01  | 0.31                      | 0.0027  | -3.18                       | 2.6              | -1.67               |
| 14 | Ccl24    | B02  | 1.21                      | 0.4075  | 1.21                        | 0.4              | 0.27                |
| 15 | Ccl3     | B03  | 1.06                      | 0.7500  | 1.06                        | 0.1              | 0.09                |
| 16 | Ccl4     | B04  | 0.72                      | 0.3408  | -1.39                       | 0.5              | -0.47               |
| 17 | Ccl5     | B05  | 0.92                      | 0.5575  | -1.09                       | 0.3              | -0.13               |
| 18 | Ccl7     | B06  | 1.03                      | 0.7626  | 1.03                        | 0.1              | 0.04                |
| 19 | Cd40lg   | B07  | 0.52                      | 0.0452  | -1.91                       | 1.3              | -0.93               |
| 20 | Cd70     | B08  | 0.24                      | 0.0010  | -4.19                       | 3.0              | -2.07               |
| 21 | Cnf      | B09  | 0.38                      | 0.0275  | -2.61                       | 1.6              | -1.39               |
| 22 | Csf1     | B10  | 1.02                      | 0.8491  | 1.02                        | 0.1              | 0.03                |
| 23 | Csf2     | B11  | 0.38                      | 0.0024  | -2.64                       | 2.6              | -1.40               |
| 24 | Csf3     | B12  | 0.50                      | 0.0033  | -1.99                       | 2.5              | -0.99               |
| 25 | Cfl1     | C01  | 0.19                      | 0.0005  | -5.18                       | 3.3              | -2.37               |
| 26 | Cx3cl1   | C02  | 0.53                      | 0.0005  | -1.89                       | 3.3              | -0.92               |
| 27 | Cxcl1    | C03  | 0.67                      | 0.0072  | -1.49                       | 2.1              | -0.57               |
| 28 | Cxcl10   | C04  | 1.44                      | 0.0484  | 1.44                        | 1.3              | 0.53                |
| 29 | Cxcl11   | C05  | 0.45                      | 0.0055  | -2.24                       | 2.3              | -1.16               |
| 30 | Cxcl12   | C06  | 2.26                      | 0.1827  | 2.26                        | 0.7              | 1.17                |
| 31 | Cxcl13   | C07  | 0.39                      | 0.0003  | -2.57                       | 3.5              | -1.36               |
| 32 | Cxcl16   | C08  | 0.61                      | 0.0540  | -1.65                       | 1.3              | -0.72               |
| 33 | Cxcl3    | C09  | 0.87                      | 0.1486  | -1.14                       | 0.8              | -0.19               |
| 34 | Cxcl5    | C10  | 1.05                      | 0.7156  | 1.05                        | 0.1              | 0.07                |
| 35 | Cxcl9    | C11  | 1.64                      | 0.0001  | 1.64                        | 4.0              | 0.71                |
| 36 | Fas1     | C12  | 0.59                      | 0.0019  | -1.70                       | 2.7              | -0.77               |
| 37 | Gpi1     | D01  | 0.64                      | 0.0398  | -1.57                       | 1.4              | -0.65               |
| 38 | Hc       | D02  | 1.77                      | 0.0180  | 1.77                        | 1.7              | 0.82                |
| 39 | Iha2     | D03  | 0.26                      | 0.0011  | -3.85                       | 3.0              | -1.95               |
| 40 | Ihg      | D04  | 1.63                      | 0.0015  | 1.63                        | 2.8              | 0.70                |
| 41 | I10      | D05  | 0.23                      | 0.0012  | -4.42                       | 2.9              | -2.14               |
| 42 | I11      | D06  | 0.24                      | 0.0043  | -4.12                       | 2.4              | -2.04               |
| 43 | I12a     | D07  | 0.48                      | 0.0138  | -2.07                       | 1.9              | -1.05               |
| 44 | I12b     | D08  | 0.29                      | 0.0029  | -3.51                       | 2.5              | -1.81               |
| 45 | I13      | D09  | 0.32                      | 0.0071  | -3.14                       | 2.1              | -1.65               |
| 46 | I15      | D10  | 0.84                      | 0.3524  | -1.19                       | 0.5              | -0.25               |
| 47 | I16      | D11  | 0.53                      | 0.0145  | -1.90                       | 1.8              | -0.93               |
| 48 | I17a     | D12  | 0.33                      | 0.0045  | -3.00                       | 2.3              | -1.59               |
| 49 | I17f     | E01  | 0.75                      | 0.0926  | -1.33                       | 1.0              | -0.41               |
| 50 | I18      | E02  | 0.89                      | 0.4793  | -1.13                       | 0.3              | -0.17               |
| 51 | I1a      | E03  | 0.68                      | 0.4472  | -1.47                       | 0.3              | -0.56               |
| 52 | I1b      | E04  | 0.34                      | 0.2747  | -2.92                       | 0.6              | -1.55               |
| 53 | I1rn     | E05  | 0.68                      | 0.0957  | -1.47                       | 1.0              | -0.56               |
| 54 | I2       | E06  | 0.30                      | 0.0190  | -3.37                       | 1.7              | -1.75               |
| 55 | I21      | E07  | 0.29                      | 0.0098  | -3.46                       | 2.0              | -1.79               |
| 56 | I22      | E08  | 0.37                      | 0.0042  | -2.67                       | 2.4              | -1.42               |
| 57 | I23a     | E09  | 0.44                      | 0.1786  | -2.25                       | 0.7              | -1.17               |
| 58 | I24      | E10  | 0.43                      | 0.0232  | -2.34                       | 1.6              | -1.23               |
| 59 | I27      | E11  | 0.46                      | 0.1550  | -2.19                       | 0.8              | -1.13               |
| 60 | I3       | E12  | 0.36                      | 0.0041  | -2.77                       | 2.4              | -1.47               |
| 61 | I4       | F01  | 0.34                      | 0.0010  | -2.91                       | 3.0              | -1.54               |
| 62 | I5       | F02  | 0.42                      | 0.0710  | -2.39                       | 1.1              | -1.26               |
| 63 | I6       | F03  | 0.34                      | 0.0209  | -2.95                       | 1.7              | -1.56               |
| 64 | I7       | F04  | 0.97                      | 0.9540  | -1.04                       | 0.0              | -0.05               |
| 65 | I9       | F05  | 0.27                      | 0.0015  | -3.69                       | 2.8              | -1.88               |
| 66 | I1f      | F06  | 0.40                      | 0.0807  | -2.48                       | 1.1              | -1.31               |
| 67 | I1a      | F07  | 0.34                      | 0.0331  | -2.96                       | 1.5              | -1.57               |
| 68 | I1b      | F08  | 0.63                      | 0.0784  | -1.58                       | 1.1              | -0.66               |
| 69 | I1f      | F09  | 1.12                      | 0.5514  | 1.12                        | 0.3              | 0.17                |
| 70 | I1sn     | F10  | 0.21                      | 0.0941  | -4.85                       | 1.0              | -2.28               |
| 71 | I1odal   | F11  | 0.29                      | 0.0009  | -3.43                       | 3.1              | -1.78               |
| 72 | I1sm     | F12  | 0.38                      | 0.0329  | -2.65                       | 1.5              | -1.40               |
| 73 | I14      | G01  | 0.68                      | 0.4216  | -1.47                       | 0.4              | -0.56               |
| 74 | I1bbp    | G02  | 0.64                      | 0.1634  | -1.56                       | 0.8              | -0.65               |
| 75 | I1pp1    | G03  | 1.71                      | 0.0649  | 1.71                        | 1.2              | 0.77                |
| 76 | I1gb2    | G04  | 0.74                      | 0.2996  | -1.36                       | 0.5              | -0.44               |
| 77 | I1po     | G05  | 0.55                      | 0.3920  | -1.82                       | 0.4              | -0.87               |
| 78 | I1nf     | G06  | 0.25                      | 0.0181  | -4.00                       | 1.7              | -2.00               |
| 79 | I1nfr11b | G07  | 0.25                      | 0.0007  | -4.07                       | 3.2              | -2.02               |
| 80 | I1nfr10  | G08  | 1.02                      | 0.7133  | 1.02                        | 0.1              | 0.03                |
| 81 | I1nfr11  | G09  | 0.38                      | 0.1108  | -2.61                       | 1.0              | -1.39               |
| 82 | I1nfr13b | G10  | 0.88                      | 0.6833  | -1.13                       | 0.2              | -0.18               |
| 83 | I1veg1a  | G11  | 0.40                      | 0.0058  | -2.52                       | 2.2              | -1.33               |
| 84 | I1c11    | G12  | 1.47                      | 0.2629  | 1.47                        | 0.5              | 0.56                |

**Supplemental Table 4.** HIF-regulated genes that may contribute to immunosuppression in HCC.

| <u>Gene</u>   | <u>Mechanism</u>                                             | <u>Reference(s)</u> |
|---------------|--------------------------------------------------------------|---------------------|
| <i>CA9</i>    | Creates an acidic extracellular milieu that inhibits T cells | 74, 80-82           |
| <i>CD47</i>   | Blocks macrophage engulfment of cancer cells                 | S1                  |
| <i>CD70</i>   | Induces immune cell apoptosis                                | 70-72               |
| <i>CD73</i>   | Converts AMP to adenosine                                    | S2                  |
| <i>CXCL1</i>  | Induces recruitment of TAMs                                  | S3                  |
| <i>ENTPD1</i> | Encodes CD39, converts ATP to AMP                            | S2                  |
| <i>HAVCR2</i> | Encodes TIM3, induces T cell exhaustion                      | S4, S5              |
| <i>IL4</i>    | Induces M2 polarization of TAMs                              | S6-S8               |
| <i>IL6</i>    | Activates MDSCs; induces M2 polarization of TAMs             | S9-S11              |
| <i>IL10</i>   | Maintains Tregs; inhibits APCs; induces TAM polarization     | S12, S13            |
| <i>IL13</i>   | Induces M2 polarization of TAMs                              | S6, S7              |
| <i>IL22</i>   | Enhances production of IL10 and TGF- $\beta$ by cancer cells | S8                  |
| <i>LDHA</i>   | Produces lactic acid to inhibit immune cell function         | 73-75, 77-79        |
| <i>PDL1</i>   | Induces T cell exhaustion                                    | 11                  |
| <i>PGF</i>    | Promotes polarization of TAMs; inhibits DC maturation        | S8                  |
| <i>SLC2A1</i> | Cancer cells compete with immune cells for glucose           | 76                  |
| <i>VEGFA</i>  | Induces recruitment of MDSCs, TAMs, and Tregs                | S8                  |
|               | Inhibits dendritic cell maturation/activation                | S14                 |
| <i>VTCN1</i>  | Encodes B7H4, induces T cell exhaustion                      | S15                 |

## Supplemental References

- S1. Chen J, et al. Macrophages induce CD47 upregulation via IL-6 and correlate with poor survival in hepatocellular carcinoma. *Oncoimmunology*. 2019;8(11):1652540.
- S2. Pang L, et al. Plasmacytoid dendritic cells recruited by HIF-1 $\alpha$ /eADO/ADORA1 signaling induce immunosuppression in hepatocellular carcinoma. *Cancer Lett*. 2021;522:80-92.
- S3. Miyake M, et al. CXCL1-mediated interaction of cancer cells with tumor-associated macrophages and cancer-associated fibroblasts promotes tumor progression in human bladder cancer. *Neoplasia*. 2016;18(10):636-646.
- S4. Hakemi MG, et al. The role of TIM-3 in hepatocellular carcinoma: a promising target for immunotherapy? *Front Oncol*. 2020;10:601661
- S5. Leone P, et al. The evolving role of immune checkpoint inhibitors in hepatocellular carcinoma treatment. *Vaccines*. 2021;9(5):532.
- S6. Deng L, et al. The role of tumor-associated macrophages in primary hepatocellular carcinoma and its related targeting therapy. *Int J Med Sci*. 2021;18(10): 2109-2116.
- S7. Han C, et al. The mechanism of lncRNA-CRNDE in regulating tumor-associated macrophage M2 polarization and promoting tumor angiogenesis. *J Cell Mol Med*. 2021;25(9):4235-4247.
- S8. Voron T, et al. Control of the immune response by pro-angiogenic factors. *Front Oncol*. 2014;4:70.
- S9. Lin Y, et al. Chemerin has a protective role in hepatocellular carcinoma by inhibiting the expression of IL-6 and GM-CSF and MDSC accumulation. *Oncogene*. 2017;36:3599-3608.

- S10. Xu M, et al. Interactions between interleukin-6 and myeloid-derived suppressor cells drive the chemoresistant phenotype of hepatocellular carcinoma. *Exp Cell Res.* 2017;351:142-149.
- S11. Yang J, Xing Z. Lingustilide counteracts carcinogenesis and hepatocellular carcinoma cell-evoked macrophage M2 polarization by regulating yes-associated protein mediated interleukin-6 secretion. *Exp Biol.* 2021;246(17):1928-1937.
- S12. Bogdan C, et al. Macrophage deactivation by interleukin 10. *J Exp Med.* 1991;174:1549.
- S13. Murai M, et al. Interleukin 10 acts on regulatory T cells to maintain expression of the transcription factor Foxp3 and suppressive function in mice with colitis. *Nat Immunol.* 2009;10:1178-1184.
- S14. Yang J, et al. Targeting VEGF/VEGFR to modulate antitumor immunity. *Front Immunol.* 2018;9:978.
- S15. MacGregor HL, Ohashi PS. Molecular pathways: evaluating the potential for B7-H4 as an immunoregulatory target. *Clin Cancer Res.* 23(12):2934-2941.

**Supplemental Table 5.** Forward (F) and reverse (R) PCR primers for amplification of human (H) and mouse (m) sequences.

| <b>Oligonucleotide</b> | <b>Sequence (5' to 3')</b> | <b>Source</b> | <b>Application</b> |
|------------------------|----------------------------|---------------|--------------------|
| H-ANGPTL4-F            | GGACACGGCCTATAGCCTG        | Sigma         | RT-qPCR            |
| H-ANGPTL4-R            | CTCTTGCGCAGTTCTTGTC        | Sigma         | RT-qPCR            |
| H-VEGFA-F              | AGGGCAGAATCATCACGAAGT      | Sigma         | RT-qPCR            |
| H-VEGFA-R              | AGGGTCTCGATTGGATGGCA       | Sigma         | RT-qPCR            |
| H-CA9-F                | TCTCGTTTCCAATGCACGTACAGC   | Sigma         | RT-qPCR            |
| H-CA9-R                | AGTGACAGCAGCAGTTGCACAGT    | Sigma         | RT-qPCR            |
| H-EPO-F                | GGAGGCCGAGAATATCACGAC      | Sigma         | RT-qPCR            |
| H-EPO-R                | CCCTGCCAGACTT CTACGG       | Sigma         | RT-qPCR            |
| H-NDRG1-F              | CTCCTGCAAGAGTTTGATGTCC     | Sigma         | RT-qPCR            |
| H-NDRG1-R              | CATGCCGATGTCATGGTAGG       | Sigma         | RT-qPCR            |
| H-SDF-1-F              | ATTCTCAACTCCAAACTGTGC      | Sigma         | RT-qPCR            |
| H-SDF-1-R              | ACTTTAGCTTCGGGTCAATGC      | Sigma         | RT-qPCR            |
| H-PGF-F                | GAACGGCTCGTCAGAGGTG        | Sigma         | RT-qPCR            |
| H-PGF-R                | ACAGTGCAGATTCTCATCGCC      | Sigma         | RT-qPCR            |
| H-CD73-F               | GCCTGGGAGCTTACGATTTTG      | Sigma         | RT-qPCR            |
| H-CD73-R               | TAGTGCCCTGGTACTGGTCCG      | Sigma         | RT-qPCR            |
| H-CD47-F               | AGAAGGTGAAACGATCATCGAGC    | Sigma         | RT-qPCR            |
| H-CD47-R               | CTCATCCATACCACCGGATCT      | Sigma         | RT-qPCR            |
| H-PDL1-F               | CCAGGATGGTTCTTAGACTCCC     | Sigma         | RT-qPCR            |
| H-PDL1-R               | TTTAGCACGAAGCTCTCCGAT      | Sigma         | RT-qPCR            |
| H-SCF-F                | AATCCTCTCGTCAAAACTGAAGG    | Sigma         | RT-qPCR            |
| H-SCF-R                | CCATCTCGCTTATCCAACAATGA    | Sigma         | RT-qPCR            |
| H-RPL13A-F             | CTCAAGGTCGTGCGTCTG         | Sigma         | RT-qPCR            |
| H-RPL13A-R             | TGGCTTTCTTTTCTTCTCTC       | Sigma         | RT-qPCR            |
| H-18S-rRNA-F           | GTAACCCGTTGAACCCATT        | Sigma         | RT-qPCR            |
| H-18S-rRNA-R           | CCATCTCGGCTTATCCAACAATGA   | Sigma         | RT-qPCR            |
| m-Angptl4-F            | CATCCTGGGACGAGATGAACT      | Sigma         | RT-qPCR            |
| m-Angptl4-R            | TGACAAGCGTTACCACAGGC       | Sigma         | RT-qPCR            |
| m-Epo-F                | ACTCTCCTTGCTACTGATTCTT     | Sigma         | RT-qPCR            |
| m-Epo-R                | ATCGTGACATTTTCTGCCTCC      | Sigma         | RT-qPCR            |
| m-Pgf-F                | TCTGCTGGGAACAACTCAACA      | Sigma         | RT-qPCR            |
| m-Pgf-R                | GTGAGACACCTCATCAGGGTAT     | Sigma         | RT-qPCR            |
| m-Rpl13a-F             | GGGCAGGTTCTGGTATTGGAT      | Sigma         | RT-qPCR            |
| m-Rpl13a-R             | GGCTCGGAAATGGTAGGGG        | Sigma         | RT-qPCR            |
| m-18S-F                | GTAACCCGTTGAACCCATT        | Sigma         | RT-qPCR            |
| m-18S-R                | CCATCCAATCGGTAGTAGCG       | Sigma         | RT-qPCR            |
| m-B7h4-F               | CTTTGGCATTTCAGGCAAGCA      | Sigma         | RT-qPCR            |



|                 |                              |       |           |
|-----------------|------------------------------|-------|-----------|
| m-B7h4-R        | TGATGTCAGGTTCAAAAGTGCAG      | Sigma | RT-qPCR   |
| m-Ca9-F         | TGCTCCAAGTGTCTGCTCAG         | Sigma | RT-qPCR   |
| m-Ca9-R         | CAGGTGCATCCTCTTCACTGG        | Sigma | RT-qPCR   |
| m-Cd47-F        | TGGTGGGAAACTACACTTGCG        | Sigma | RT-qPCR   |
| m-Cd47-R        | CGTGCGGTTTTTCAGCTCTAT        | Sigma | RT-qPCR   |
| m-Cd70-F        | TGTAGCGGACTACTCAGTAAGC       | Sigma | RT-qPCR   |
| m-Cd70-R        | TGGGGTCCTTCCGAGGAAC          | Sigma | RT-qPCR   |
| m-Cd73-F        | CCTGCACACAAACGACGTG          | Sigma | RT-qPCR   |
| m-Cd73-R        | CTGGTCTCCGGCATCCAAA          | Sigma | RT-qPCR   |
| m-Cxcl1-F       | ACTGCACCCAAACCGAAGTC         | Sigma | RT-qPCR   |
| m-Cxcl1-R       | TGGGGACACCTTTTAGCATCTT       | Sigma | RT-qPCR   |
| m-Entpd1-F      | AAGGTGAAGAGATTTTGCTCAA       | Sigma | RT-qPCR   |
| m-Entpd1-R      | TTTGTCTGGGTCAGTCCCAC         | Sigma | RT-qPCR   |
| m-Il6-F         | TAGTCCTCCTACCCCAATTTCC       | Sigma | RT-qPCR   |
| m-Il6-R         | TTGGTCCTTAGCCACTCCTC         | Sigma | RT-qPCR   |
| m-Il10-F        | GCTCTTACTGACTGG              | Sigma | RT-qPCR   |
| m-Il11-F        | TGTTCTCCTAACCCGATCCCT        | Sigma | RT-qPCR   |
| m-Il11-R        | CAGGAAGCTGCAAAGATCCCA        | Sigma | RT-qPCR   |
| m-Il22-F        | ATGAGTTTTTCCCTTATGGGGAC      | Sigma | RT-qPCR   |
| m-Il22-R        | GCTGGAAGTTGGACACCTCAA        | Sigma | RT-qPCR   |
| m-Ldha-F        | TGTCTCCAGCAAAGACTACTGT       | Sigma | RT-qPCR   |
| m-Ldha-R        | GACTGTACTTGACAATGTTGGGA      | Sigma | RT-qPCR   |
| m-Pdl1-F        | GACCAGCTTTTGAAGGGAATG        | Sigma | RT-qPCR   |
| m-Pdl1-R        | CTGGTTGATTTTGC GG TATGG      | Sigma | RT-qPCR   |
| m-Slc2a1-F      | CAGTTCGGCTATAAACTGGTG        | Sigma | RT-qPCR   |
| m-Slc2a1-R      | GCCCCGACAGAGAAGATG           | Sigma | RT-qPCR   |
| m-Tim3-F        | TCAGGTCTTACCCTCAACTGTG       | Sigma | RT-qPCR   |
| m-Tim3-R        | GGGCAGATAGGCATTTTTACCA       | Sigma | RT-qPCR   |
| m-Vegfa-F       | CTGCCGTCCGATTGAGACC          | Sigma | RT-qPCR   |
| m-Vegfa-R       | CCCCTCCTGTACCACTGTC          | Sigma | RT-qPCR   |
| H-ANGPTL4-HRE-F | ATTTGCTGTCCTGGCATC           | Sigma | ChIP-qPCR |
| H-ANGPTL4-HRE-R | CCAGCTCATTCTCTGGAATC         | Sigma | ChIP-qPCR |
| H-CA9-HRE-F     | GACAAACCTGTGAGACTTTGGCTCC    | Sigma | ChIP-qPCR |
| H-CA9-HRE-R     | AGTGACAGCAGCAGTTGCACAGTG     | Sigma | ChIP-qPCR |
| H-EPO-HRE-F     | GCCCTACGTGCTGTCTCACAC        | Sigma | ChIP-qPCR |
| H-EPO-HRE-F     | CCTTGATGACAATCTCAGCGC        | Sigma | ChIP-qPCR |
| H-PDK1-HRE-F    | CGCGTTTGGATTCCGTG            | Sigma | ChIP-qPCR |
| H-PDK1-HRE-R    | CCAGTTATAATCTGCCTTCCCTATTATC | Sigma | ChIP-qPCR |
| H-RPL13A-F      | GAGGCGAGGGTGATAGAG           | Sigma | ChIP-qPCR |
| H-RPL13A-R      | ACACACAAGGGTCCAATTC          | Sigma | ChIP-qPCR |

**Supplemental Table 6.** Antibodies for ChIP, immunoblot (IB) assays and ELISAs for quantification of human (h) and mouse (m) proteins; antibodies for flow cytometry (FC) and in vivo studies (IV), experimental models, chemicals, peptides, and other reagents.

| Target protein                   | Catalog number    | Vendor                      | Application |
|----------------------------------|-------------------|-----------------------------|-------------|
| h-HIF-1 $\alpha$                 | NB100-479         | Novus Biologicals           | IB, ChIP    |
| h-HIF-1 $\beta$                  | NB100-110         | Novus Biologicals           | ChIP        |
| h-HIF-2 $\alpha$                 | NB100-122         | Novus Biologicals           | IB, ChIP    |
| h-p300                           | NB500-161         | Novus Biologicals           | ChIP        |
| m- $\beta$ -Actin                | Sc-47778          | Santa Cruz<br>Biotechnology | IB          |
| m-Cxcl1                          | DY453             | Novus Biologicals           | ELISA       |
| m-Cxcl2                          | MM200             | Novus Biologicals           | ELISA       |
| m-Cxcl9                          | MCX900            | Novus Biologicals           | ELISA       |
| m-Cxcl10                         | DY466             | Novus Biologicals           | ELISA       |
| m-Il22                           | M2200             | Novus Biologicals           | ELISA       |
| m-Il6                            | M6000B            | Novus Biologicals           | ELISA       |
| m-Il10                           | DY417             | Novus Biologicals           | ELISA       |
| m-Vegfa                          | MMV00             | Novus Biologicals           | ELISA       |
| h-EPO                            | DEP00             | Novus Biologicals           | ELISA       |
| h-SCF                            | DCK00             | Novus Biologicals           | ELISA       |
| h-SDF-1 $\alpha$                 | DSA00             | Novus Biologicals           | ELISA       |
| h-VEGFA                          | DVE00             | Novus Biologicals           | ELISA       |
| m-EPO                            | MEP00B            | Novus Biologicals           | ELISA       |
| m-Cd3                            | FAB4841G          | Novus Biologicals           | FC          |
| m-Cd4                            | FAB554A           | Novus Biologicals           | FC          |
| m-Cd8A                           | NBP1-49045-PE     | Novus Biologicals           | FC          |
| m-Cd11b                          | NB110-89474-AF405 | Novus Biologicals           | FC          |
| m-Cd11c                          | NB110-40766-AF488 | Novus Biologicals           | FC          |
| m-Cd25                           | NBP2-27425-AF488  | Novus Biologicals           | FC          |
| m-Cd44                           | NBP1-47386-APC    | Novus Biologicals           | FC          |
| m-Cd69                           | NBP1-28011-AF488  | Novus Biologicals           | FC          |
| m-Cd314                          | FAB 1547V         | Novus Biologicals           | FC          |
| m-F4/80                          | NB600-404-APC     | Novus Biologicals           | FC          |
| m-Foxp3                          | NB100-39002-PE    | Novus Biologicals           | FC          |
| m-Ifng                           | IC485V            | Novus Biologicals           | FC          |
| m-Ly6c                           | NBP1-28046-AF488  | Novus Biologicals           | FC          |
| m-Ly6g                           | FAB1037A          | Novus Biologicals           | FC          |
| m-Nk1.1                          | NB100-77528-APC   | Novus Biologicals           | FC          |
| Rat IgG2a, $\kappa$ , anti-m-PD1 | BE0089            | Bio X Cell                  | IV          |
| Rat IgG2a isotype control        | Bio X Cell        | Bio X Cell                  | IV          |

|                                                             |                       |                   |                           |
|-------------------------------------------------------------|-----------------------|-------------------|---------------------------|
| Hep3B human hepatocellular carcinoma cell line              | HB-8064               | ATCC              | Cell culture              |
| Hepa1-6 mouse hepatoma cell line                            | CRL-1830              | ATCC              | Cell culture              |
| Dulbecco's modified Eagle's medium                          | 10-013-CV             | ThermoFisher      | Cell culture              |
| FBS                                                         | 100-106 BenchMark FBS | GeminiBio         | Cell culture              |
| Penicillin-Streptomycin                                     | P0781                 | Sigma             | Cell culture              |
| Matrigel Matrix Basement Membrane                           | 354234                | Westnet           | IV                        |
| TRIzol Reagent                                              | 15596026              | Invitrogen        | RNA                       |
| CREMOPHOR EL STERILIZED                                     | 238470-1SET           | Sigma             | IP Formulation            |
| PEG-400                                                     | PX1286B-2             | Sigma             | IP Formulation            |
| Ethanol                                                     | 1009861000            | Sigma             | IP Formulation            |
| ECL Prime reagent                                           | SKU# GERPN2232        | GE Healthcare     | IB                        |
| Collagenase type I                                          | SCR103                | Sigma Aldrich     | Tumor study               |
| High-Capacity RNA-to-cDNA Kit                               | 4387406               | Applied Biosystem | RNA                       |
| RNase-Free DNase Set                                        | 79254                 | Qiagen            | RNA                       |
| iQ SYBR Green Supermix                                      | 1708884               | BioRad            | qPCR                      |
| RT2 Profiler™ PCR Array of Mouse Cytokines & Chemokines     | 330231 PAMM-150ZA     | Qiagen            | RT2-qPCR assay            |
| Dual Luciferase Reporter Assay System                       | E1960                 | Promega           | Luciferase reporter assay |
| HEPES                                                       | 15-630-080            | ThermoFisher      | IB                        |
| Protease Inhibitor                                          | P8340                 | Sigma             | IB                        |
| Triton X-100                                                | 11332481001           | Sigma             | IB                        |
| EDTA                                                        | 60-00-4               | Sigma             | IB                        |
| Tris-HCl                                                    | 10812846001           | Sigma             | IB                        |
| glycerol                                                    | G5516                 | Sigma             | IB                        |
| salmon sperm DNA/protein A agarose slurry                   | 16-157                | Sigma             | ChIP                      |
| 37% formaldehyde                                            | F79-500               | Sigma             | ChIP                      |
| SDS                                                         | 151-21-3              | Sigma             | IB, ChIP                  |
| Sodium deoxycholate                                         | 302-95-4              | Sigma             | ChIP                      |
| UltraPure™ Phenol:Chloroform:Isoamyl Alcohol (25:24:1, v/v) | 15593031              | ThermoFisher      | ChIP                      |
| Nonidet P-40                                                | J19628.K2             | ThermoFisher      | ChIP                      |

## Supplemental Methods

**General chemistry procedures.** All commercially available reagents and solvents were used without further purification unless otherwise stated. Automated flash chromatography was performed on a Teledyne Isco CombiFlash Rf+ or Grace Reveleris using Teledyne Isco or Grace/Buchi flash silica and/or C18 cartridges. Spectra were recorded on a Bruker Avance-III spectrometer ( $^1\text{H}$  NMR at 500 MHz and  $^{13}\text{C}$  NMR at 125 MHz) at 296 K in  $\text{CDCl}_3$  ( $^1\text{H}$  NMR referenced to internal standard tetramethylsilane 0 ppm,  $^{13}\text{C}$  NMR referenced to 77.00 ppm),  $d_6$ -DMSO ( $^1\text{H}$  NMR referenced to 2.50 ppm,  $^{13}\text{C}$  NMR referenced to 39.510 ppm). Analytical LC-MS was performed using Agilent 1260 equipped with autosampler (Agilent Poroshell 120 column (50 x 3.0 mm I.D., 2.7  $\mu\text{m}$ ); 0.05% TFA in water/acetonitrile gradient; UV detection at 220 and 254 nm) and electrospray ionization. Unless otherwise noted, all final compounds showed purity greater than 95% at 215 and 254 nm using this method.

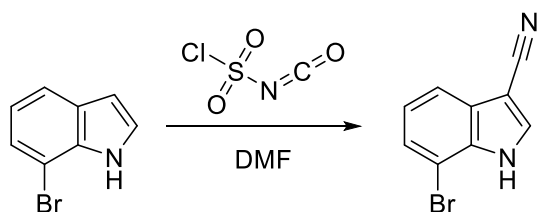

**Synthesis of 7-bromo-1H-indole-3-carbonitrile.** This procedure is a slight modification to that reported by Vorbruggen and Krolikiewicz (1). To a rapidly stirred solution of 7-bromoindole (5.0 g, 25.5 mmol, 1.0 equiv.) in anhydrous DMF (17 ml) was added chlorosulfonyl isocyanate (2.4 ml, 28.1 mmol, 1.1 equiv.) dropwise while cooling with an ice water bath. Once addition was complete, the ice water bath was allowed to equilibrate to rt overnight (ca. 18h). The reaction was added slowly to rapidly stirred ice water resulting in a precipitate. The solid is filtered, washed with water and dried under vacuum to provide 7-bromo-1H-indole-3-carbonitrile as a red-brown solid (5.32 g, 94%). This material was used without further purification.  $^1\text{H}$  NMR (500 MHz, DMSO- $d_6$ )  $\delta$  8.28 (s, 1H), 7.76 (s, 1H), 7.60 (d,  $J$  = 8.49 Hz, 1H), 7.37 (dd,  $J$  = 1.41, 8.49 Hz, 1H).  $^{13}\text{C}$  NMR (126 MHz, DMSO- $d_6$ )  $\delta$  136.1, 135.6, 125.7, 124.6, 120.2, 115.9, 115.8, 115.6, 84.6. LCMS  $t_{\text{R}}$ =2.33 min,  $m/z$  220.9, 222.8 [ $\text{M} + \text{H}$ ] $^+$  242.9, 244.9 [ $\text{M} + \text{Na}$ ] $^+$ .

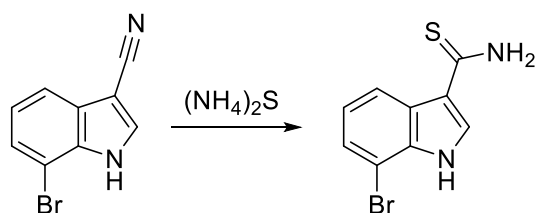

**Synthesis of 7-bromo-1H-indole-3-carbothioamide.** This procedure is a slight modification to that reported by Bagley and coworkers (2). To a 5 ml Biotage vial were charged 7-bromo-1H-indole-3-carbonitrile (398 mg, 1.80 mmol, 1.00 equiv.), 20 wt% aq.  $(\text{NH}_4)_2\text{S}$  (3.1 ml, 9.0 mmol, 5.0 equiv.) and MeOH (0.6 mL). After sealing the vial, the suspension was irradiated in a Biotage Initiator microwave for 3h at 100°C. After cooling the reaction mixture, the precipitate was filtered, washed with water and dried under vacuum to obtain pale yellow crystals (438 mg, 95% yield) of 7-bromo-1H-indole-3-carbothioamide. This material was used in the next step without further purification.  $^1\text{H}$  NMR (500 MHz, DMSO- $d_6$ )  $\delta$  11.84 (br. s., 1H), 9.03 (br. s., 1H), 8.90 (br. s., 1H), 8.59

(d,  $J = 8.65$  Hz, 1H), 8.09 (s, 1H), 7.62 (d,  $J = 1.73$  Hz, 1H), 7.27 (dd,  $J = 1.73, 8.65$  Hz, 1H).  $^{13}\text{C}$  NMR (126 MHz, DMSO- $d_6$ )  $\delta$  193.2, 137.7, 128.4, 125.2, 123.7, 123.6, 116.3, 114.8, 114.6. LCMS  $t_R=2.07$  min.  $m/z$  257.0, 254.9  $[\text{M} + \text{H}]^+$ .

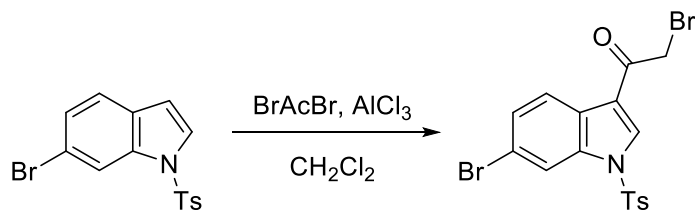

**Synthesis of 2-bromo-1-(6-bromo-1-tosyl-1H-indol-3-yl)ethan-1-one.** To a suspension of  $\text{AlCl}_3$  (30.17 mmol) in  $\text{CH}_2\text{Cl}_2$  (60 mL) was added bromoacetyl bromide (1440  $\mu\text{L}$ , 16.5 mmol) at rt for 15 min. To this mixture was added a solution of 6-bromo-1-tosyl-1H-indole (7.31 mmol) in  $\text{CH}_2\text{Cl}_2$  (10 mL) dropwise at  $0^\circ\text{C}$ . The mixture was stirred at  $0^\circ\text{C}$  for 1h and poured onto ice (60 g). The aqueous layer was extracted with  $\text{CH}_2\text{Cl}_2$ . The organic extracts were washed with saturated aq.  $\text{NaHCO}_3$ , brine and dried over anhydrous  $\text{Na}_2\text{SO}_4$ . After removal of the solvent, the crude product was recrystallized with  $\text{CHCl}_3/\text{EtOH}$  and column chromatographed with methylene chloride/hexane to afford 2-bromo-1-(6-bromo-1-tosyl-1H-indol-3-yl)ethan-1-one (2.32 g, 67% yield) as a white solid.  $^1\text{H}$  NMR (500 MHz, CHLOROFORM- $d$ )  $\delta$  8.30 (s, 1H), 8.16 (d,  $J = 8.49$  Hz, 1H), 8.12 (d,  $J = 1.57$  Hz, 1H), 7.82 - 7.87 (m,  $J = 8.49$  Hz, 2H), 7.48 (dd,  $J = 1.65, 8.57$  Hz, 1H), 7.30 - 7.37 (m,  $J = 8.17$  Hz, 2H), 4.33 (s, 2H), 2.41 (s, 3H);  $^{13}\text{C}$  NMR (125.7 MHz, CHLOROFORM- $d$ )  $\delta$  186.8, 146.6, 135.4, 134.0, 133.0, 130.6, 128.6, 127.2, 126.4, 124.3, 120.0, 117.8, 116.3, 31.1, 21.8; LCMS  $m/z$  471.6  $[\text{M} + \text{H}]^+$ . Analytical and spectroscopic data were in agreement with those previously reported (3).

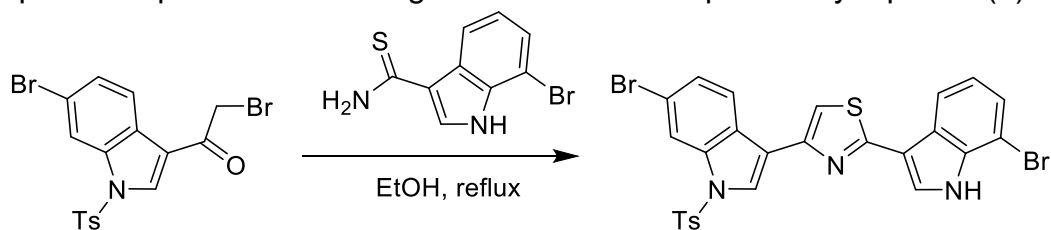

**Synthesis of 4-(6-bromo-1-tosyl-1H-indol-3-yl)-2-(7-bromo-1H-indol-3-yl)thiazole.** A suspension of 7-bromo-1H-indole-3-carbothioamide (815 mg, 3.19 mmol) and 2-bromo-1-(6-bromo-1-tosyl-1H-indol-3-yl)ethan-1-one (4) (1.58 g, 3.35 mmol) in EtOH (100 ml) was refluxed for 30 min. The mixture was cooled and the precipitates were filtered, washed with cold EtOH (20 mL x 2) and dried under vacuum to provide 4-(6-bromo-1-tosyl-1H-indol-3-yl)-2-(7-bromo-1H-indol-3-yl)thiazole (2.00 g, 99.9% yield) as a white solid. This material was used in the next step without further purification.

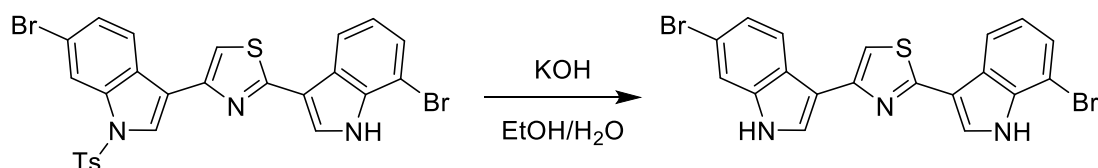

#### 32-134D

**Synthesis of 4-(6-bromo-1H-indol-3-yl)-2-(7-bromo-1H-indol-3-yl)thiazole (32-134D; FW = 473.2 g/mol).** To a suspension of 4-(6-bromo-1-tosyl-1H-indol-3-yl)-2-(7-bromo-1H-indol-3-yl)thiazole (2.00 g, 3.19 mmol) in ethanol (40 ml) and water (40 ml), was added KOH (4 g, 5% W/V). The mixture was heated at reflux under nitrogen until complete (1 day). Water (40 mL) was added at RT to dilute the mixture. The reaction mixture was

filtered, washed with water (30 mL x 3) and the precipitate was dried. The precipitate was dissolved with EtOAc and EtOH and absorbed onto silica gel. Column chromatography (Hexane/(EtOAc + 10% EtOH)) provided 4-(6-bromo-1H-indol-3-yl)-2-(7-bromo-1H-indol-3-yl)thiazole (32-134D) (1.20 g, 79.4 % yield in two steps overall). <sup>1</sup>H NMR (500 MHz, DMSO-d<sub>6</sub>) δ 12.00 (br. s., 1H), 11.54 (br. s., 1H), 8.39 (d, *J* = 8.02 Hz, 1H), 8.18 (d, *J* = 8.65 Hz, 1H), 8.17 (s, 1H), 8.04 (s, 1H), 7.69 (s, 1H), 7.67 (s, 1H), 7.49 (d, *J* = 7.55 Hz, 1H), 7.30 (d, *J* = 8.65 Hz, 1H), 7.21 (t, *J* = 7.78 Hz, 1H); <sup>13</sup>C-NMR (125.7 MHz, DMSO-d<sub>6</sub>) δ 161.8, 150.5, 138.0, 135.4, 127.9, 126.5, 126.3, 125.6, 124.2, 123.0, 122.7, 122.4, 120.6, 114.9, 114.8, 112.4, 111.9, 107.7, 105.3; LCMS *m/z* 471.6 [M + H]<sup>+</sup>.

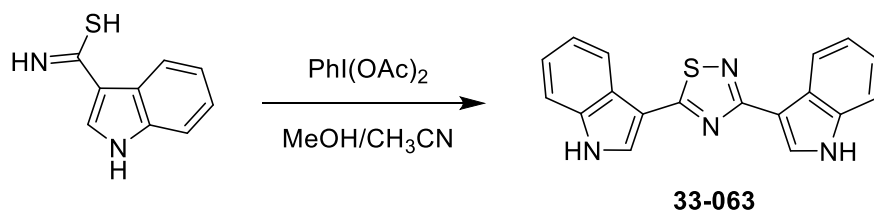

*Synthesis of 3,5-di(1H-indol-3-yl)-1,2,4-thiadiazole (5, 6) (33-063; FW = 316.4 g/mol).* Iodobenzene diacetate (1.02 g, 2.41 mmol) was added to a stirred solution of indole-3-thiocarboxamide (416 mg, 2.36 mmol) in MeOH/CH<sub>3</sub>CN (12 mL/12 mL) at 25 °C. The reaction was complete within 20 min. The reaction mixture was concentrated and filtered through celite washing with EtOAc. The EtOAc was concentrated *in vacuo* and the residue was purified by column chromatography on silica gel. 3,5-di(1H-indol-3-yl)-1,2,4-thiadiazole was obtained in a (275 mg, 74% yield). <sup>1</sup>H NMR (500 MHz, DMSO-d<sub>6</sub>) δ 12.13 (br. s., 1H), 11.72 (br. s., 1H), 8.47 (m, 1H), 8.43 (s, 1H), 8.27 (m, 2H), 7.57 (m, 1H), 7.53 (m, 1H), 7.32 (m, 2H), 7.23 (m, 2H); <sup>13</sup>C NMR (125.7 MHz, DMSO-d<sub>6</sub>) δ 180.7, 170.2, 137.2, 137.1, 129.8, 129.2, 125.6, 124.7, 123.4, 122.6, 122.0, 121.0, 120.7, 113.1, 112.5, 110.7, 108.1; LCMS *m/z* 317.0 [M + H]<sup>+</sup>.

*Bioanalytical method for mouse pharmacokinetics.* Plasma (25 μL) was added to a borosilicate glass test tube and mixed with 150 μL of acetonitrile containing the internal standard (1 ng/mL of EXP-3179). For blank samples, 150 μL of acetonitrile was added without internal standard. Samples were vortex-mixed and centrifuged (1200 ×g for 5 minutes at ambient temperature) and transferred to an autosampler vial. Then 2 μL was injected onto the liquid chromatography system using a temperature-controlled autosampling device operating at approximately 10°C. Chromatographic analysis was performed using a Waters Acquity™ Ultra Performance LC. Separation of the analyte from potentially interfering material was achieved at ambient temperature using Halo C18 column (50 x 2.1 mm i.d.) with a 2.7-μm particle size. The mobile phase used for the chromatographic separation was composed of 0.1% (v/v) formic acid in water (mobile phase A) and 0.1% (v/v) formic acid in acetonitrile (mobile phase B) with a flow rate of 0.4 mL/minute. The initial mobile phase composition was 60% mobile phase A and 40% mobile phase B. From 0.5 to 2.0 minutes, mobile phase B was increased linearly from 40% to 100% and maintained until 3.0 minutes. From 3.0 to 3.1 min, the gradient decreased to 40% mobile phase B and the conditions were maintained until 5 minutes to re-equilibrate the column for the next injection. The column effluent was monitored using an AB Sciex Triple Quadrupole 5500 mass spectrometer. The instrument was equipped with an electrospray interface, operated in a positive mode and controlled by the Analyst

v1.7 software. The settings were as follows: curtain gas 20 psi, medium collision gas, ion spray voltage 5500 V, probe temperature 450°C, ion source gas one 30 psi, ion source gas two 40 psi, and entrance potential 10. The collision cell exit potentials were 14.0 and 6.0 for 32-134D and the internal standard, respectively. The declustering potential was 141 and 80 for 32-134D and the internal standard, respectively. The collision energies were 43 and 25 for 32-134D and internal standard, respectively. MRM m/z transitions were the following: 474.6 → 393.8 and 421.0 → 207.1 for 32-134D and the internal standard, respectively. Dwell time was 150 milliseconds. The calibration curve for 32-134D was constructed from the peak area ratio of the analyte to the peak area of its internal standard (EXP-3179) using the least-squares quadratic regression analysis with  $1/x^2$  weight over the range of 0.01-2.11  $\mu\text{M}$  with dilutions of up to 1:10 (v/v).

## References

1. Vorbruggen H, and Krolikiewicz K. The Introduction of Nitrile-Groups into Heterocycles and Conversion of Carboxylic Groups into their Corresponding Nitriles with Chlorosulfonylisocyanate and Triethylamine. *Tetrahedron*. 1994;50(22):6549-6558.
2. Bagley MC, Chapaneri K, Glover C, Merritt EA. Simple Microwave-Assisted Method for the Synthesis of Primary Thioamides from Nitriles *Synlett*. 2004;(14):2615–2617.
3. Guo J, et al. Optimization, Structure-Activity Relationship, and Mode of Action of Nortopsentin Analogues Containing Thiazole and Oxazole Moieties. *J. Agric. Food Chem.* 2019;67(36):10018–10031.
4. Jiang B, and Gu XH. Syntheses and cytotoxicity evaluation of bis(indolyl)thiazole, bis(indolyl)pyrazinone and bis(indolyl)pyrazine: Analogues of cytotoxic marine bis(indole) alkaloid. *Bioorganic Med. Chem.* 2000;8(2):363–371.
5. Pedras MSC, Hossain S, and Snitynsky RB. Detoxification of cruciferous phytoalexins in *Botrytis cinerea*: Spontaneous dimerization of a camalexin metabolite. *Phytochemistry*. 2011;72(2-3):199–206.
6. Kumar D, Kumar NM, Chang KH, Gupta R, Shah K. Synthesis and in-vitro anticancer activity of 3,5-bis(indolyl)-1,2,4-thiadiazoles. *Bioorganic Med. Chem. Lett.* 2011;21(19):5897–5900.
